# Supplementary material for: Normal Values for the fT3/fT4 Ratio: Centile Charts (0-29 Years) and Their Application for the Differential Diagnosis of Children with Developmental Delay
Source: Preprints.org preprint supplement (doi:10.20944/preprints202407.0194.v1), 2024-07-02
Supplement: Supplementary file 1 [file Table_A1.xlsx]

## Sheet: Tabelle1
ID	sex	age [years]	fT3 [pmol/L]	fT3 [SDS]	fT4 [pmol/L]	fT4 [SDS]	fT3/fT4 ratio	fT3/fT4 ratio [SDS]	COHORT	MUTATION	AFFECTED STATUS	Patient from / Citation	PMID
CP#01	male	1.33	6.74	-0.265214	14.44	-1.10394	0.466759	0.821991	Cerebral palsy			Berlin
CP#02	male	2.5	5.45	-1.53909	13.64	-1.37322	0.39956	-0.342069	Cerebral palsy			Berlin
CP#03	male	7.08	5.25	-1.2356	15.83	0.288484	0.331649	-1.37188	Cerebral palsy			Berlin
CP#04	male	10.25	5.62	-0.673476	16.22	0.650325	0.346486	-1.10958	Cerebral palsy			Berlin
CP#05	male	10.58	5.1	-1.37325	14.16	-0.276658	0.360169	-0.891944	Cerebral palsy			Berlin
CP#06	male	12.08	5.95	-0.238992	15.44	0.391353	0.385363	-0.542104	Cerebral palsy			Berlin
CP#07	female	6	7.88	1.72024	16.22	0.276474	0.48582	1.31766	Cerebral palsy			Berlin
CP#08	female	6.67	6.68	0.485294	12.87	-1.35413	0.519037	1.73373	Cerebral palsy			Berlin
CP#09	female	12.17	6.76	1.15782	14.54	0.142952	0.464924	0.765979	Cerebral palsy			Berlin
CP#10	female	15.92	5.75	0.848915	11.95	-1.03051	0.481172	1.60344	Cerebral palsy			Berlin
CP#11	female	16	4.99	-0.215182	13.9	-0.00598951	0.358993	-0.187796	Cerebral palsy			Berlin
CP#12	female	16.67	5.53	0.712878	13.64	-0.0864009	0.405425	0.639612	Cerebral palsy			Berlin
MCT8#01 (patient 1)	male	5.17	9.32	3.03335	8.33	-4.2474	1.11885	6.74083	MCT8	c.1235dupG; p.(Leu413Profs*25)	severe	Berlin
MCT8#01	male	5.75	10.17	3.66591	8.06	-4.38873	1.26179	7.52915	MCT8	c.1235dupG; p.(Leu413Profs*25)	severe	Berlin
MCT8#01	male	5.83	9.32	3.03043	6.91	-5.23167	1.34877	7.97255	MCT8	c.1235dupG; p.(Leu413Profs*25)	severe	Berlin
MCT8#01	male	6.17	9.75	3.34522	8.17	-4.28031	1.19339	7.14285	MCT8	c.1235dupG; p.(Leu413Profs*25)	severe	Berlin
MCT8#01	male	6.67	9.28	2.9876	6.84	-5.2503	1.35673	7.95604	MCT8	c.1235dupG; p.(Leu413Profs*25)	severe	Berlin
MCT8#02 (patient 2)	male	0.92	9.22	2.55405	16.09	-0.21337	0.573027	2.26034	MCT8	c.1399G>A; p.(Gly467Ser)	mild	Berlin
MCT8#02	male	1.33	10.17	3.54209	14.16	-1.26419	0.71822	3.73817	MCT8	c.1399G>A; p.(Gly467Ser)	mild	Berlin
MCT8#02	male	1.67	9.52	2.97348	13.77	-1.43088	0.691358	3.52922	MCT8	c.1399G>A; p.(Gly467Ser)	mild	Berlin
MCT8#03 (patient 3)	male	6.5	8.51	2.38601	15.06	-0.146667	0.565073	2.28887	MCT8	c1378A>T, p.(Ile460Phe)	very mild	Berlin
MCT8#03	male	6.58	7.24	1.22001	11.46	-2.12408	0.631763	3.00699	MCT8	c1378A>T, p.(Ile460Phe)	very mild	Berlin
MCT8#03	male	6.92	6.8	0.76132	12.15	-1.68884	0.559671	2.20394	MCT8	c1378A>T, p.(Ile460Phe)	very mild	Berlin
MCT8#04	male	0.92	9.22	2.55405	16.09	-0.21337	0.573027	2.26034	MCT8	c.1399G>A; p.(Gly467Ser)	mild	Berlin
MCT8#04	male	1.33	10.17	3.54209	14.16	-1.26419	0.71822	3.73817	MCT8	c.1399G>A; p.(Gly467Ser)	mild	Berlin
MCT8#04	male	1.67	9.52	2.97348	13.77	-1.43088	0.691358	3.52922	MCT8	c.1399G>A; p.(Gly467Ser)	mild	Berlin
MCT8#05	male	1.25	15.24	7.84181	8.47	-4.64733	1.79929	>10.00	MCT8	c590G>A; p.(Arg197His)	severe	Berlin
MCT8#05	male	1.4	18.43	>10.00	8.21	-4.79159	2.24482	>10.00	MCT8	c590G>A; p.(Arg197His)	severe	Berlin
MCT8#05	male	1.67	13.6	6.50533	8.65	-4.46928	1.57225	>10.00	MCT8	c590G>A; p.(Arg197His)	severe	Berlin
MCT8#06	male	4.17	11.95	5.05985	11.37	-2.44186	1.05101	6.30813	MCT8	c.852_862dupGCCCAGCTCCC, p.(Q288Rfs*59)	severe	Berlin
MCT8#06	male	4.5	12.17	5.17556	11.02	-2.6085	1.10436	6.64036	MCT8	c.852_862dupGCCCAGCTCCC, p.(Q288Rfs*59)	severe	Berlin
MCT8#06	male	4.75	12.37	5.27578	9.83	-3.30738	1.25839	7.49882	MCT8	c.852_862dupGCCCAGCTCCC, p.(Q288Rfs*59)	severe	Berlin
MCT8#07	male	10.5	5.91	-0.278784	5.66	-6.11469	1.04417	5.43619	MCT8	Deletion of SLC16A2 exons 3 + 4	severe	Munich (Dr. Petrova)
MCT8#07	male	10.75	7.62	1.61673	8.5	-3.6118	0.896471	4.5019	MCT8	Deletion of SLC16A2 exons 3 + 4	severe	Munich (Dr. Petrova)
MCT8#07	male	11	8.23	2.0854	9.27	-3.02991	0.88781	4.38901	MCT8	Deletion of SLC16A2 exons 3 + 4	severe	Munich (Dr. Petrova)
MCT8#08	male	13.33	9.74	2.94031	8.28	-3.57015	1.17633	5.54791	MCT8	c.979G>A; p.(Gly327Arg)	severe	Berlin
MCT8#08	male	13.58	8.28	2.07861	8.5	-3.39253	0.974118	4.55056	MCT8	c.979G>A; p.(Gly327Arg)	severe	Berlin
MCT8#08	male	14.08	9.03	2.5726	9.05	-2.96917	0.99779	4.71259	MCT8	c.979G>A; p.(Gly327Arg)	severe	Berlin
MCT8#08	male	14.25	9.49	2.83648	8.2	-3.66071	1.15732	5.53299	MCT8	c.979G>A; p.(Gly327Arg)	severe	Berlin
MCT8#08	male	14.67	10.03	3.13583	9.69	-2.50639	1.03509	5.00336	MCT8	c.979G>A; p.(Gly327Arg)	severe	Berlin
MCT8#08	male	15.17	9.9	3.12143	9.12	-2.9518	1.08553	5.38972	MCT8	c.979G>A; p.(Gly327Arg)	severe	Berlin
MCT8#09	male	5.17	9.32	3.03335	8.33	-4.2474	1.11885	6.74083	MCT8	c.1235dupG; p.(Leu413Profs*25)	severe	Berlin
MCT8#09	male	5.75	10.17	3.66591	8.06	-4.38873	1.26179	7.52915	MCT8	c.1235dupG; p.(Leu413Profs*25)	severe	Berlin
MCT8#09	male	5.83	9.32	3.03043	6.91	-5.23167	1.34877	7.97255	MCT8	c.1235dupG; p.(Leu413Profs*25)	severe	Berlin
MCT8#09	male	6.17	9.75	3.34522	8.17	-4.28031	1.19339	7.14285	MCT8	c.1235dupG; p.(Leu413Profs*25)	severe	Berlin
MCT8#09	male	6.67	9.28	2.9876	6.84	-5.2503	1.35673	7.95604	MCT8	c.1235dupG; p.(Leu413Profs*25)	severe	Berlin
MCT8#10	male	2.83	9.2	2.81588	7.25	-5.23647	1.26897	7.35749	MCT8	c.1171-1G>T (splicing defect)	severe	Berlin
MCT8#10	male	3	11.06	4.43776	7.94	-4.74474	1.39295	7.95604	MCT8	c.1171-1G>T (splicing defect)	severe	Berlin
MCT8#10	male	3.33	6.08	-0.640924	6.54	-5.68677	0.929664	5.48569	MCT8	c.1171-1G>T (splicing defect)	severe	Berlin
MCT8#11	female	22	7.2	2.99885	8.8	-3.28215	0.818182	6.1779	MCT8	c.1025T>C, p.(Leu342Pro), heterozygous, de novo	mild	Munich (Dr. Zech)	Dystonia genome sequencing cohort, Zech et al., manuscript in preparation
MCT8#12	male	0.42	13.3	6.26613	9.12	-4.36867	1.45833	7.69051	MCT8	Deletion of SLC16A2 exon 2	severe	Munich (Dr. Petrova)
MCT8#13	female	5	7.2	0.956475	11.6	-2.17553	0.62	3.12819	MCT8	c.578A>T, p.(Asn193Ile)	mild, no LT4	Berlin, Munich (Dr. Kuhnle)
MCT8#13	female	11	10.1	3.51334	16.2	0.799205	0.623	2.39675	MCT8	c.578A>T, p.(Asn193Ile)	mild, 125 µg LT4	Berlin, Munich (Dr. Kuhnle)
MCT8#13	female	14	7.9	3.51334	12.3	0.799205	0.64	2.39675	MCT8	c.578A>T, p.(Asn193Ile)	mild, 125 µg LT4	Berlin, Munich (Dr. Kuhnle)
MCT8#13	female	21	5.5	1.15738	14.9	1.18383	0.36	-0.029555	MCT8	c.578A>T, p.(Asn193Ile)	mild, 125 µg LT4 + 125 mg PTU	Berlin, Munich (Dr. Kuhnle)
SECISBP2#01	male	9	2.6	-4.82902	37.6	7.36597	0.0691489	-7.76945	SECISBP2	c.382C>T, p.(Arg128X)		Cosmo 2009	19602558
SECISBP2#02	male	10	3.8	-3.13717	30	5.31313	0.126667	-5.79495	SECISBP2	p.(Met515fsX563)/p.(Gln79X)		Hamajima 2012	22247018
SECISBP2#03	male	29	3.8	-1.9707	41.1	>10.00	0.0924574	<(-10.00)	SECISBP2	p.fs255X		Schoenmakers 2010	21084748
SECISBP2#04	female	11	3.6	-3.44343	37.6	7.46682	0.0957447	-7.70376	SECISBP2	Chr9:91935388-91941101del; Deletion SECISBP2 exons 3 + 4		Schoenmakers 2023	38042913
THRA#01	male	18	7.96	2.56774	10.04	2.27347	0.79	4.39171	THRA	c.1176C>A, p.(Cys392X)		Tylki-Szymanska 2015	25670821
THRA#02	female	14	10.97	4.20287	20.59	2.52312	0.53	1.81349	THRA	c.1207G>T, p.(Glu403X)		Tylki-Szymanska 2015	25670821
THRA#03	female	12	6.94	1.30771	13.35	-0.434576	0.51	1.39156	THRA	c.1207G>A, p.(Glu403K)		Tylki-Szymanska 2015	25670821
THRA#04	female	8	5.62	-0.805508	9.05	-3.10377	0.62	2.75796	THRA	c.1193C>G, p.(Pro398Arg)		Tylki-Szymanska 2015	25670821
THRA#05	male	17	7.6	2.06066	10	-2.32136	0.76	3.85989	THRA	c.788C>T, p.(Ala263Val)		Moran 2017	28471274
THRA#06	male	15	9.1	2.68681	8.4	-3.54372	1.08	5.33166	THRA	c.821T>C, p.(Leu274Pro)		Moran 2017	28471274
THRA#07	male	3	8.04	1.69783	13	-1.66187	0.62	2.90149	THRA	c.1183G.T, p.(Glu395X)		Sun 2019	30842990
THRA#08	male	26	6.8	3.17627	9.7	-2.67784	0.7	4.24739	THRA	c.788C>T, p.(Ala263Val)		Moran 2014	24969835
THRA#09	male	29	6.4	2.9692	10.5	-2.03721	0.6	3.44737	THRA	c.788C>T, p.(Ala263Val)		Moran 2014	24969835
THRA#10	male	4	8.6	2.3636	12.4	-1.86588	0.69	3.66764	THRA	c.871G>A; p.(Gly291Ser)		Korkmaz 2019	30747412
THRA#11	female	25	6.1	2.14576	10.3	-1.84962	0.59	3.69125	THRA	c.1075A>T; p.(Asn359Tyr)		Espiard 2015	26037512
THRA#12	female	19	7.8	3.12359	15	0.898444	0.52	2.46381	THRA	c.788C > T, p.(Ala236Val)		Dahl 2023	37469961
THRA#13	female	26	6.8	3.07251	9.6	-2.535	0.7	5.27919	THRA	c.788C > T, p.(Ala236Val)		Dahl 2023	37469961
THRA#14	male	25	7.2	3.48236	9.6	-2.6954	0.75	4.65354	THRA	c.788C > T, p.(Ala236Val)		Dahl 2023	37469961
THRA#15	female	6	8.8	2.5341	11.8	-1.96532	0.75	4.3444	THRA	c.575T>A, p.(Leu192Gln)		Berlin
