# Supplementary figures and images for: Normal Values for the fT3/fT4 Ratio: Centile Charts (0-29 Years) and Their Application for the Differential Diagnosis of Children with Developmental Delay
Source: Preprints.org preprint supplement (doi:10.20944/preprints202407.0194.v1), 2024-07-02

**fT3/fT4 ratios in normal females at 0–29 years**

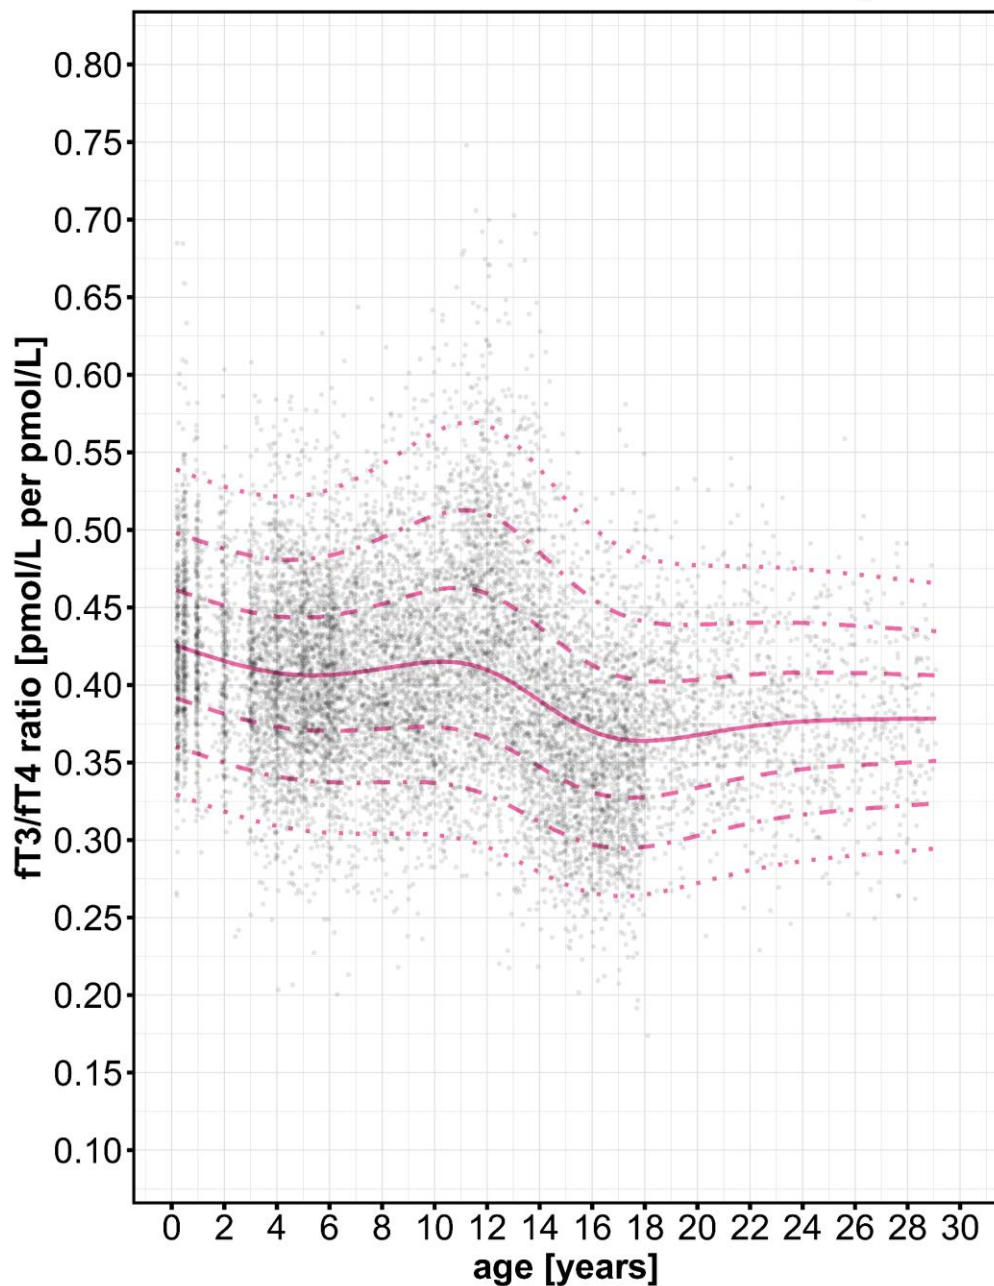

**fT3/fT4 ratios in normal males at 0–29 years**

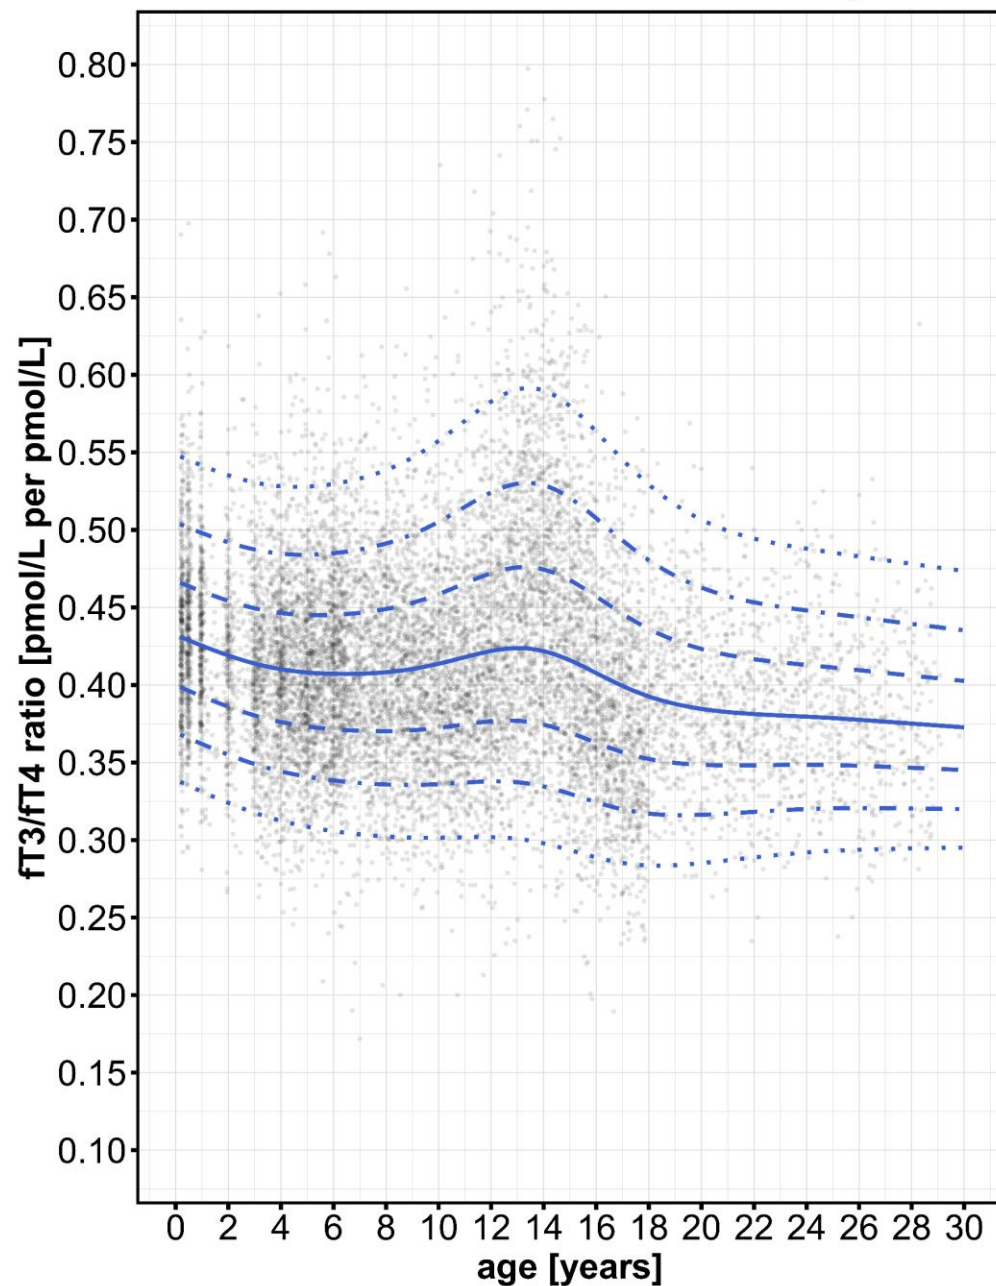

Supplement: Supplementary file 1 [file supplementary]
